# Supplementary material for: Factors associated with discharge from hospital to residential aged care for younger people with neuropsychiatric disorders: an exploratory case–control study in New South Wales, Australia
Source: HighWire-hosted journal article supplement (doi:10.1136/bmjopen-2022-065982), 2022-12-01
Supplement: bmjopen-2022-065982supp001_data_supplement.pdf [file bmjopen-2022-065982supp001_data_supplement.pdf]

## Supplementary Tables

## Supplementary Table A. Diagnostic categories

| <b>Collapsed diagnosis group</b>                    | <b>ICD-10 codes</b>                                                                                                        |
|-----------------------------------------------------|----------------------------------------------------------------------------------------------------------------------------|
| Infections                                          | A, B (not B18), G00-G07, J0-J2, J85, J86, Y95, Z22                                                                         |
| Primary malignant cancers                           | C0-C6, C70-C76, C8-C9                                                                                                      |
| Secondary malignant cancers                         | C77-C79                                                                                                                    |
| Other cancers                                       | D0-D4                                                                                                                      |
| Blood disorders                                     | D55-D59, D6-D9                                                                                                             |
| Other endocrine, nutritional and metabolic diseases | D50-D53, E0, E12 (not E12.2), E15, E16, E2-E5 (not E51.2), E60, E61, E63-E68, E7, E8, E9                                   |
| Diabetes                                            | E10 (not E10.2), E11 (not E11.2), E13 (not E13.2), E14 (not E14.2), O24                                                    |
| Wernicke's encephalopathy                           | E51.2                                                                                                                      |
| Dementia                                            | F00, F01, F02, F03, G30, G31.0, G31.3                                                                                      |
| Delirium                                            | F05                                                                                                                        |
| Secondary mental disorders                          | F06, F07, F09                                                                                                              |
| Alcohol, substance and other mental disorders       | F04, F1, F38, F44, F45, F48, F5 (not F50), F6, F8 (not F84), F9                                                            |
| Schizophrenia                                       | F2                                                                                                                         |
| Other common mental disorders                       | F30-F33, F34 (not F34.0), F39, F40-F43, F50                                                                                |
| Autism spectrum disorders                           | F84                                                                                                                        |
| Huntington's disease                                | G10                                                                                                                        |
| Motor neurone disease                               | G12.2                                                                                                                      |
| Parkinson disease                                   | G20                                                                                                                        |
| Multiple sclerosis                                  | G35                                                                                                                        |
| Epilepsy                                            | G40, G41                                                                                                                   |
| Other neurological conditions                       | G08, G09, G11, G12 (not G12.2), G13, G14, G2 (not G20), G3 (not G30, G31.0, G31.3, G35), G43, G44, G47, G5-G7, G81-G83, G9 |
| Cerebral palsy                                      | G80                                                                                                                        |
| Diseases of eyes and ears                           | H (not H0.00)                                                                                                              |
| Coronary heart disease                              | I20-I25                                                                                                                    |
| Stroke                                              | I6                                                                                                                         |
| Other circulatory system disorders                  | G45, G46, I0, I10, I11, I13, I15, I26-I28, I3, I4, I50-I52, I7, I8 (not I85), I9                                           |
| Asthma                                              | J45, J46                                                                                                                   |
| Chronic respiratory diseases                        | J40-J44, J47, J6, J7, J80-J84, J9                                                                                          |
| Upper respiratory diseases                          | J3 (not J34.0)                                                                                                             |
| Dental caries                                       | K02, K04                                                                                                                   |
| Other oral disorders                                | K00, K01, K03, K05-K09, K1                                                                                                 |
| Chronic liver disease                               | B18, I85, K70-K76                                                                                                          |
| Diseases of the digestive system                    | K2-K5, K6 (not K62.2, K62.3) K77, K8, K9                                                                                   |
| Skin disease                                        | A46, B08, B86, H00.0, H60, J34.0, L0-L7, L8 (not L89), L90-L95, L98 (not L98.4), L99                                       |
| Pressure injury and ulcers                          | L89, L97, L98.4                                                                                                            |
| Musculoskeletal                                     | M                                                                                                                          |
| Acute and chronic renal disease                     | E10.2, E11.2, E12.2, E13.2, E14.2, I12, N0 (not N00, N01), N1, N20-N28, N35, N36, N37, N39.1, N39.2, Q61                   |

## Supplementary Tables

|                                                |                                                                                                                                                                                                                                                                                                                                                                                                                                                                                                                                                                                                                                                                                                                                                                            |
|------------------------------------------------|----------------------------------------------------------------------------------------------------------------------------------------------------------------------------------------------------------------------------------------------------------------------------------------------------------------------------------------------------------------------------------------------------------------------------------------------------------------------------------------------------------------------------------------------------------------------------------------------------------------------------------------------------------------------------------------------------------------------------------------------------------------------------|
| Other genitourinary diseases                   | D25, K62.2, K62.3, N30-N32, N34, "N39", N39.0, N39.3, N39.4, N4, N50, N6, N7, N8, N9, O94, R15, R32                                                                                                                                                                                                                                                                                                                                                                                                                                                                                                                                                                                                                                                                        |
| Other symptoms and signs                       | R00, R02, R20-R23, R30, R31, R33-R39, R47-R49, R50-R55, R57-R65                                                                                                                                                                                                                                                                                                                                                                                                                                                                                                                                                                                                                                                                                                            |
| Neurological symptoms and signs                | R25-R29, R40-R44, R56                                                                                                                                                                                                                                                                                                                                                                                                                                                                                                                                                                                                                                                                                                                                                      |
| Gastrointestinal symptoms and signs            | R10-R14, R16-R19                                                                                                                                                                                                                                                                                                                                                                                                                                                                                                                                                                                                                                                                                                                                                           |
| Circulatory and respiratory symptoms and signs | R01, R03-R09                                                                                                                                                                                                                                                                                                                                                                                                                                                                                                                                                                                                                                                                                                                                                               |
| Behavioural and emotional symptoms and signs   | R45, R46                                                                                                                                                                                                                                                                                                                                                                                                                                                                                                                                                                                                                                                                                                                                                                   |
| Traumatic brain injury                         | "S02", S02.0, S02.1, S02.7, S02.9, S06                                                                                                                                                                                                                                                                                                                                                                                                                                                                                                                                                                                                                                                                                                                                     |
| Spinal cord injury                             | "S14", S14.0, S14.1, S14.7, 'S24', S24.0, S24.1, S24.7, "S34", S34.0, S34.1, S34.7, T06.0, T06.1, T09.3                                                                                                                                                                                                                                                                                                                                                                                                                                                                                                                                                                                                                                                                    |
| Fractures                                      | S02.2-S02.6, S02.8, S12, S22, S32, S42, S49, S52, S59.7, S62, S69, S72, S82, S92, T02, T08, T10, T12, T14.2<br>S00, S01, S03-S05, S07, S08, S09, S10, S11, S13, S14.2-S14.6, S15, S16, S17, S18, S19, S20, S21, S23, S24.2-S24.6, S25, S26, S27, S28, S29, S30, S31, S33, S34.2-S34.6, S34.8, S35-S41, S43-S48, S50, S51, S53-S58, "S59", S59.7, S59.8, S59.9, S60, S61, S63-S68, S69.8, S69.9, S70, S71, S73-S78, S80, S81, S83-S91, S93-S99, T00, T01, T03-T05, T06.2-T06.8, T07, "T09", T09.0-T09.2, T09.4-T09.9, T11, T13, "T14", T14.0, T14.1, T14.3-T14.9, T15-T19, T2, T3, T4, T5, T6, T70-T74, T75 (not T75.1), T79, T80, T81, T88, T89, V (not V90, V92), W2-W6, W70, W73-W79, W8, W9, X0-X5, X85-X89, X9, Y0, Y35, Y36, Y4-Y7, Y80-Y86, Y87 (not 87.0), Y88, Y89 |
| Other injuries                                 |                                                                                                                                                                                                                                                                                                                                                                                                                                                                                                                                                                                                                                                                                                                                                                            |
| Falls                                          | W0, W1                                                                                                                                                                                                                                                                                                                                                                                                                                                                                                                                                                                                                                                                                                                                                                     |
| Intentional self-harm                          | X6, X7, X80-X84, Y87.0                                                                                                                                                                                                                                                                                                                                                                                                                                                                                                                                                                                                                                                                                                                                                     |
| Rehabilitation, convalescence and respite      | Z50, Z54, Z75.5                                                                                                                                                                                                                                                                                                                                                                                                                                                                                                                                                                                                                                                                                                                                                            |
| Housing and living situation                   | Z59-Z65                                                                                                                                                                                                                                                                                                                                                                                                                                                                                                                                                                                                                                                                                                                                                                    |
| Palliative care                                | Z51.5                                                                                                                                                                                                                                                                                                                                                                                                                                                                                                                                                                                                                                                                                                                                                                      |
| Mobility and personal care                     | Z74, Z75.0, "Z99", Z99.3, Z99.8, Z99.9                                                                                                                                                                                                                                                                                                                                                                                                                                                                                                                                                                                                                                                                                                                                     |
| Other Z codes                                  | Y93, Y96, Y98, Z00-Z07, Z11-Z13, Z20, Z21, Z28, Z29, Z4, "Z51", Z51.0-Z51.4, Z51.6, Z51.81, Z51.88, Z51.9, Z52, Z53, Z55-Z59, Z71-Z73, "Z75", Z75.1-Z75.4, Z75.8, Z75.9, Z76, Z8, Z90, Z91 (not Z91.7), Z92-Z98, Z99.0-Z99.2                                                                                                                                                                                                                                                                                                                                                                                                                                                                                                                                               |

## Supplementary Tables

Supplementary Table B. Diagnostic predictors of transfer from hospital to RAC on discharge using diagnoses recorded during hospital admissions in the 365 days prior to the index admission

| <b>Diagnosis variable</b>                | <b>Cases<sup>a</sup></b><br>n=4,406 | <b>Controls<sup>b</sup></b><br>n=512,063 | <b>Unadjusted</b><br>Odds ratio<br>(95%CI) | <b>Partially adjusted</b><br>Odds ratio <sup>d</sup><br>(95%CI) | <b>Full model</b><br>Odds ratio <sup>c</sup><br>(95% CI) |
|------------------------------------------|-------------------------------------|------------------------------------------|--------------------------------------------|-----------------------------------------------------------------|----------------------------------------------------------|
| Huntington disease                       | 87 (2.0%)                           | 187 (0.0%)                               | 55.14 (42.68–71.23)                        | 30.84 (22.82–41.67)                                             | 33.41 (23.56–47.37)                                      |
| Dementia                                 | 621 (14.1%)                         | 1,131 (0.2%)                             | 74.12 (66.87–82.16)                        | 18.26 (16.21–20.56)                                             | 13.39 (11.66–15.37)                                      |
| Multiple sclerosis                       | 199 (4.5%)                          | 3,067 (0.6%)                             | 7.85 (6.78–9.09)                           | 7.67 (6.52–9.04)                                                | 6.71 (5.54–8.12)                                         |
| Wernicke's encephalopathy                | 70 (1.6%)                           | 239 (0.0%)                               | 34.57 (26.44–45.20)                        | 7.81 (5.73–10.65)                                               | 5.91 (4.14–8.42)                                         |
| Need for palliative care                 | 471 (10.7%)                         | 2,567 (0.5%)                             | 23.76 (21.43–26.34)                        | 7.53 (6.72–8.44)                                                | 4.99 (4.24–5.87)                                         |
| Motor neurone disease                    | 58 (1.3%)                           | 562 (0.1%)                               | 12.14 (9.25–15.94)                         | 6.53 (4.86–8.79)                                                | 4.74 (3.34–6.71)                                         |
| Parkinson's disease                      | 149 (3.4%)                          | 1,255 (0.2%)                             | 14.25 (11.99–16.93)                        | 5.33 (4.39–6.46)                                                | 4.57 (3.61–5.77)                                         |
| Intellectual disability                  | 700 (15.9%)                         | 17,257 (3.4%)                            | 5.42 (4.99–5.88)                           | 3.89 (3.52–4.30)                                                | 3.51 (3.12–3.95)                                         |
| Stroke                                   | 1,063 (24.1%)                       | 14,373 (2.8%)                            | 11.01 (10.26–11.82)                        | 3.65 (3.38–3.96)                                                | 2.86 (2.57–3.18)                                         |
| Problems with mobility and personal care | 1,063 (24.1%)                       | 5,308 (1.0%)                             | 30.36 (28.19–32.69)                        | 7.99 (7.33–8.71)                                                | 2.73 (2.47–3.01)                                         |
| Other genitourinary diseases             | 2,195 (49.8%)                       | 41,614 (8.1%)                            | 11.22 (10.57–11.92)                        | 5.48 (5.13–5.87)                                                | 2.35 (2.17–2.55)                                         |
| Cerebral palsy                           | 90 (2.0%)                           | 2,182 (0.4%)                             | 4.87 (3.94–6.03)                           | 5.89 (4.62–7.52)                                                | 2.32 (1.77–3.05)                                         |
| Pressure injury and ulcers               | 1,007 (22.9%)                       | 6,728 (1.3%)                             | 22.25 (20.66–23.97)                        | 4.32 (3.96–4.72)                                                | 2.17 (1.96–2.41)                                         |
| Falls                                    | 1,165 (26.4%)                       | 25,109 (4.9%)                            | 6.97 (6.51–7.46)                           | 2.77 (2.57–2.99)                                                | 1.70 (1.52–1.89)                                         |
| Epilepsy                                 | 508 (11.5%)                         | 15,652 (3.1%)                            | 4.13 (3.76–4.54)                           | 3.31 (2.98–3.68)                                                | 1.64 (1.45–1.86)                                         |
| Neurological symptoms and signs          | 1,837 (41.7%)                       | 36,962 (7.2%)                            | 9.19 (8.65–9.77)                           | 4.06 (3.80–4.34)                                                | 1.62 (1.49–1.76)                                         |

## Supplementary Tables

|                                                                          |               |                 |                     |                  |                  |
|--------------------------------------------------------------------------|---------------|-----------------|---------------------|------------------|------------------|
| Primary malignant cancers                                                | 711 (16.1%)   | 18,282 (3.6%)   | 5.20 (4.79–5.64)    | 2.16 (1.98–2.36) | 1.57 (1.35–1.82) |
| Secondary mental disorders                                               | 228 (5.2%)    | 2,285 (0.4%)    | 12.17 (10.59–14.00) | 3.31 (2.79–3.92) | 1.45 (1.20–1.76) |
| Other factors influencing health status and contact with health services | 3,608 (81.9%) | 270,761 (52.9%) | 4.03 (3.73–4.35)    | 1.91 (1.76–2.07) | 1.40 (1.28–1.54) |
| Chronic liver disease                                                    | 539 (12.2%)   | 16,403 (3.2%)   | 4.21 (3.84–4.62)    | 1.84 (1.67–2.04) | 1.38 (1.22–1.56) |
| Infections                                                               | 2,550 (57.9%) | 83,614 (16.3%)  | 7.04 (6.63–7.48)    | 2.95 (2.76–3.15) | 1.37 (1.26–1.50) |
| Delirium                                                                 | 417 (9.5%)    | 4,707 (0.9%)    | 11.27 (10.15–12.51) | 3.14 (2.79–3.54) | 1.32 (1.15–1.53) |
| Gastrointestinal symptoms and signs                                      | 1,368 (31.0%) | 44,335 (8.7%)   | 4.75 (4.45–5.07)    | 2.73 (2.54–2.93) | 1.32 (1.21–1.44) |
| Chronic respiratory diseases                                             | 1,179 (26.8%) | 26,339 (5.1%)   | 6.74 (6.30–7.21)    | 1.87 (1.74–2.02) | 1.31 (1.19–1.43) |
| Other neurological conditions                                            | 2,203 (50.0%) | 148,120 (28.9%) | 2.46 (2.32–2.61)    | 2.21 (2.07–2.36) | 1.30 (1.20–1.42) |
| Other endocrine, nutritional and metabolic diseases                      | 2,463 (55.9%) | 84,603 (16.5%)  | 6.40 (6.03–6.80)    | 2.19 (2.06–2.34) | 1.24 (1.14–1.35) |
| Problems related to housing, economic and social situation               | 995 (22.6%)   | 57,548 (11.2%)  | 2.30 (2.15–2.47)    | 1.47 (1.36–1.59) | 1.23 (1.12–1.35) |
| Behavioural and emotional symptoms and signs                             | 502 (11.4%)   | 23,666 (4.6%)   | 2.65 (2.42–2.91)    | 1.83 (1.64–2.04) | 1.22 (1.07–1.39) |
| Dental caries                                                            | 92 (2.1%)     | 3,123 (0.6%)    | 3.48 (2.82–4.29)    | 1.60 (1.25–2.06) | 1.20 (0.91–1.59) |
| Diabetes                                                                 | 983 (22.3%)   | 35,856 (7.0%)   | 3.81 (3.55–4.10)    | 1.37 (1.26–1.48) | 1.20 (1.09–1.31) |
| Other symptoms and signs                                                 | 2,153 (48.9%) | 73,456 (14.3%)  | 5.71 (5.38–6.06)    | 2.71 (2.53–2.89) | 1.13 (1.04–1.23) |
| Traumatic brain injury                                                   | 215 (4.9%)    | 12,094 (2.4%)   | 2.12 (1.85–2.44)    | 1.57 (1.34–1.84) | 1.13 (0.94–1.36) |
| Alcohol, substance and other mental disorders                            | 1,457 (33.1%) | 153,056 (29.9%) | 1.16 (1.09–1.23)    | 1.06 (0.99–1.14) | 1.07 (0.98–1.17) |
| Skin disease                                                             | 981 (22.3%)   | 28,613 (5.6%)   | 4.84 (4.50–5.20)    | 1.83 (1.68–1.99) | 1.07 (0.97–1.17) |
| Diseases of eyes and ears                                                | 761 (17.3%)   | 20,568 (4.0%)   | 4.99 (4.61–5.40)    | 1.85 (1.69–2.02) | 1.06 (0.96–1.18) |

## Supplementary Tables

|                                                |               |                 |                     |                  |                  |
|------------------------------------------------|---------------|-----------------|---------------------|------------------|------------------|
| Other injuries                                 | 2,332 (52.9%) | 134,307 (26.2%) | 3.16 (2.98–3.36)    | 1.80 (1.69–1.92) | 1.02 (0.93–1.10) |
| Diseases of the digestive system               | 1,778 (40.4%) | 83,648 (16.3%)  | 3.47 (3.26–3.68)    | 1.59 (1.49–1.70) | 0.99 (0.92–1.07) |
| Secondary malignant cancers                    | 350 (7.9%)    | 6,874 (1.3%)    | 6.34 (5.67–7.09)    | 2.61 (2.32–2.94) | 0.98 (0.81–1.19) |
| Fractures                                      | 612 (13.9%)   | 28,682 (5.6%)   | 2.72 (2.49–2.96)    | 1.48 (1.35–1.63) | 0.97 (0.85–1.10) |
| Other circulatory system disorders             | 2,323 (52.7%) | 88,989 (17.4%)  | 5.30 (5.00–5.63)    | 1.57 (1.47–1.68) | 0.95 (0.87–1.03) |
| Circulatory and respiratory symptoms and signs | 610 (13.8%)   | 33,924 (6.6%)   | 2.26 (2.08–2.47)    | 1.16 (1.06–1.27) | 0.92 (0.83–1.03) |
| Other common mental disorders                  | 1,099 (24.9%) | 136,978 (26.8%) | 0.91 (0.85–0.97)    | 0.85 (0.79–0.92) | 0.92 (0.84–1.00) |
| Schizophrenia                                  | 464 (10.5%)   | 34,839 (6.8%)   | 1.61 (1.46–1.78)    | 0.41 (0.36–0.46) | 0.90 (0.79–1.03) |
| Other oral disorders                           | 166 (3.8%)    | 6,828 (1.3%)    | 2.90 (2.48–3.39)    | 1.40 (1.17–1.69) | 0.87 (0.71–1.06) |
| Rehabilitation, convalescence and respite      | 1,484 (33.7%) | 22,958 (4.5%)   | 10.82 (10.15–11.53) | 2.38 (2.20–2.58) | 0.85 (0.77–0.94) |
| Acute and chronic renal disease                | 744 (16.9%)   | 20,147 (3.9%)   | 4.96 (4.58–5.37)    | 1.39 (1.27–1.52) | 0.85 (0.76–0.95) |
| Musculoskeletal                                | 1,861 (42.2%) | 105,794 (20.7%) | 2.81 (2.64–2.98)    | 1.48 (1.38–1.58) | 0.85 (0.77–0.92) |
| Asthma                                         | 107 (2.4%)    | 10,767 (2.1%)   | 1.16 (0.96–1.41)    | 0.81 (0.66–1.00) | 0.84 (0.67–1.05) |
| Other cancers                                  | 203 (4.6%)    | 15,683 (3.1%)   | 1.53 (1.33–1.76)    | 0.92 (0.79–1.07) | 0.75 (0.63–0.89) |
| Blood disorders                                | 827 (18.8%)   | 20,929 (4.1%)   | 5.42 (5.02–5.86)    | 1.58 (1.44–1.72) | 0.73 (0.65–0.81) |
| Coronary heart disease                         | 326 (7.4%)    | 18,079 (3.5%)   | 2.18 (1.95–2.45)    | 0.69 (0.61–0.77) | 0.62 (0.54–0.71) |
| Intentional self-harm                          | 93 (2.1%)     | 29,150 (5.7%)   | 0.36 (0.29–0.44)    | 0.45 (0.36–0.56) | 0.59 (0.46–0.75) |
| Upper respiratory diseases                     | 65 (1.5%)     | 12,798 (2.5%)   | 0.58 (0.46–0.75)    | 0.73 (0.56–0.95) | 0.56 (0.42–0.76) |
| Spinal cord injury                             | 25 (0.6%)     | 775 (0.2%)      | 3.76 (2.53–5.61)    | 0.32 (0.20–0.51) | 0.29 (0.18–0.47) |
